# Supplementary material for: Heterostructure design of CoMoS 2 /NiSe 2 enabled electric field engineering toward efficient water electrolysis
Source: Royal Society of Chemistry journal article supplement (doi:10.1039/d5ce01124h), 2026-01-01
Supplement: d5ce01124h1.pdf [file d5ce01124h1.pdf]

## Supporting Information

# Heterostructure design of CoMoS<sub>2</sub>/NiSe<sub>2</sub>-induced electric field engineering toward promoted efficient water electrolysis

Xiaodong Cai<sup>1,\*</sup>, Qian Liao<sup>1</sup>, Danhua Jiao<sup>2,\*</sup>

1 School of Chemical Engineering, Guizhou Minzu University, Guiyang 550025 Guizhou, China

2 School of Materials Science and Engineering, Guizhou Minzu University, Guiyang 550025 Guizhou, China

\* Corresponding authors: [caixiaodong@gzmu.edu.cn](mailto:caixiaodong@gzmu.edu.cn) (X. Cai); [jiaodanhua0411@163.com](mailto:jiaodanhua0411@163.com)

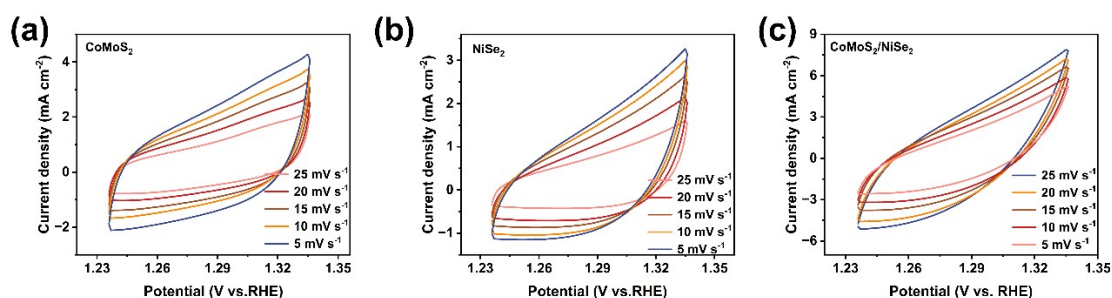

**Fig. S1** CV curves of (a) CoMoS<sub>2</sub>, (b) NiSe<sub>2</sub>, (c) CoMoS<sub>2</sub>/NiSe<sub>2</sub> for OER at different sweep rates in 1.0 M KOH solution.

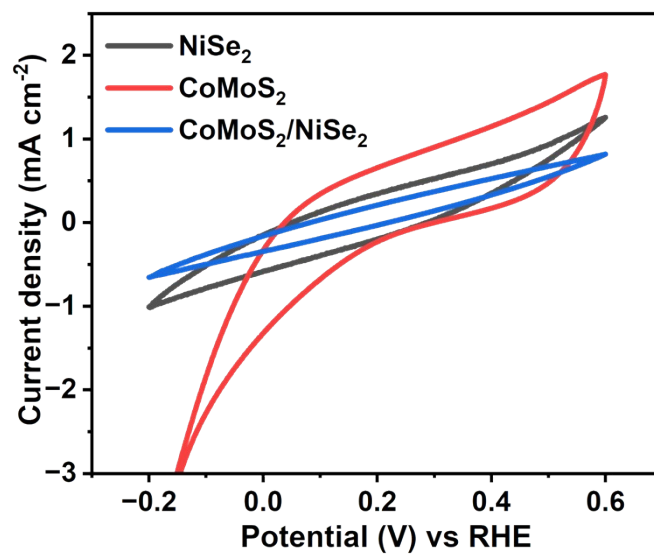

**Fig. S2** CV curves of the catalysts in PB (pH=7) with scan rate of  $50 \text{ mV}\cdot\text{s}^{-1}$ .

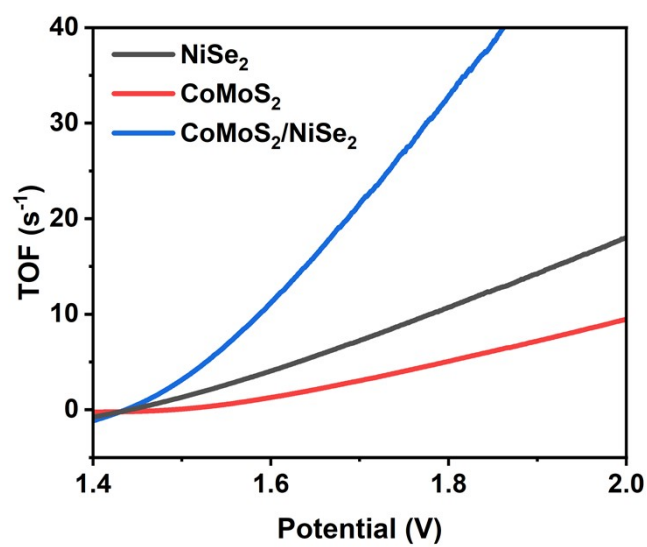

**Fig. S3** Calculated TOF of the catalysts for OER in 1.0 M KOH.

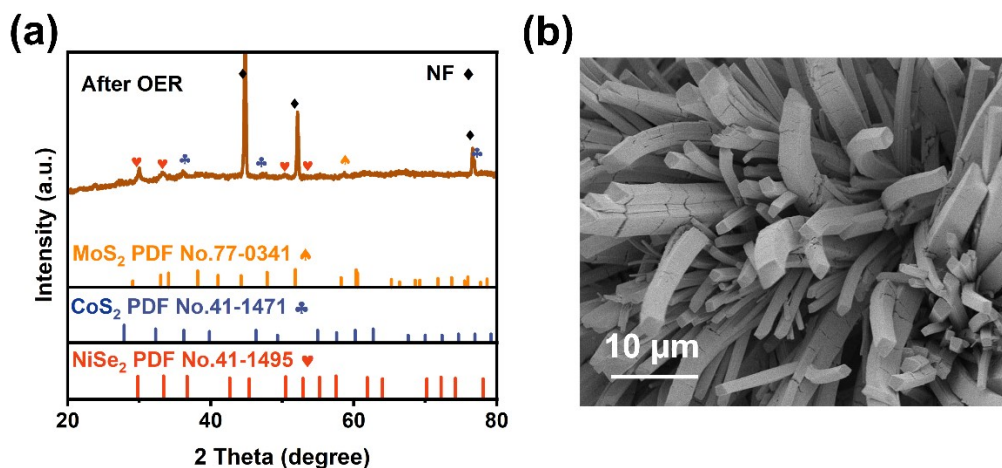

**Fig. S4** (a) XRD patterns and (b) SEM image of CoMoS<sub>2</sub>/NiSe<sub>2</sub> after OER test.

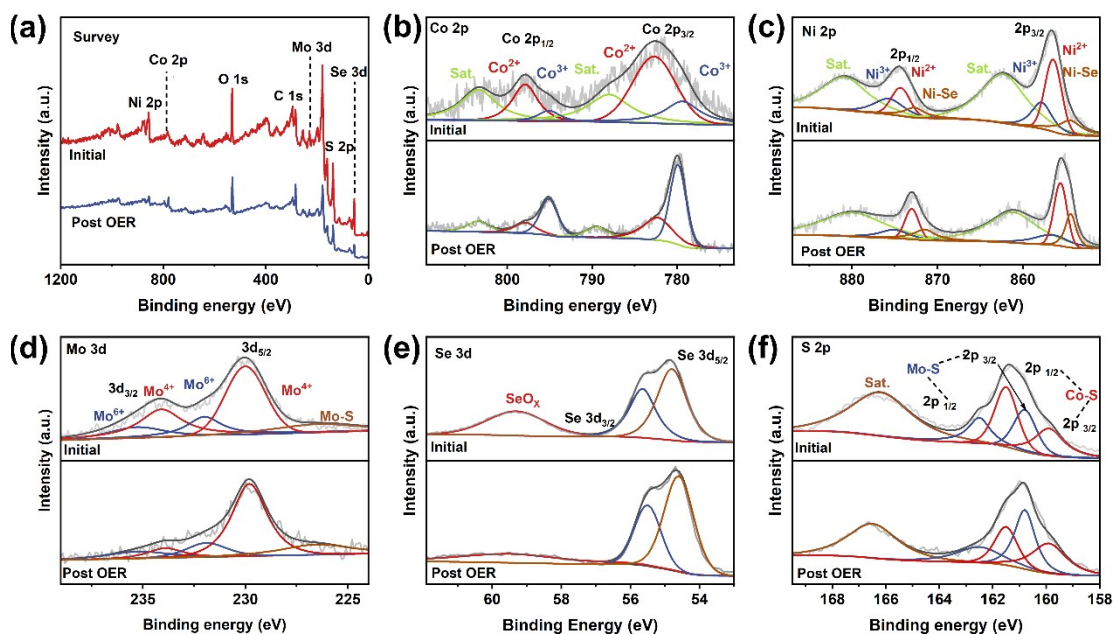

**Fig. S5** XPS image of CoMoS<sub>2</sub>/NiSe<sub>2</sub> after OER test.

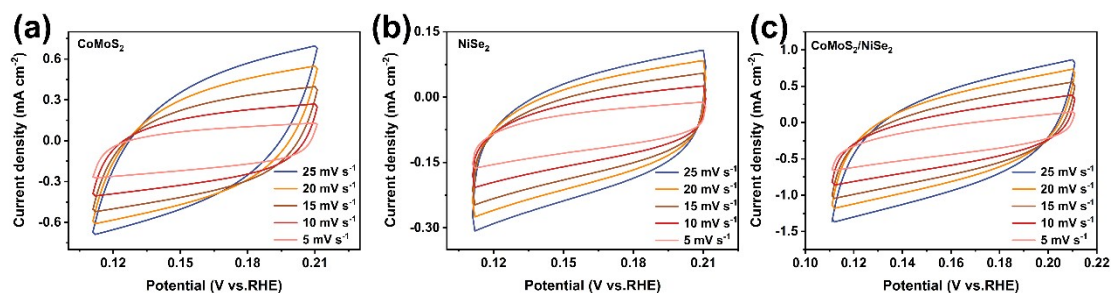

**Fig. S6** CV curves of (a) CoMoS<sub>2</sub>, (b) NiSe<sub>2</sub>, (c) CoMoS<sub>2</sub>/NiSe<sub>2</sub> for HER at different sweep rates in 1.0 M KOH solution.

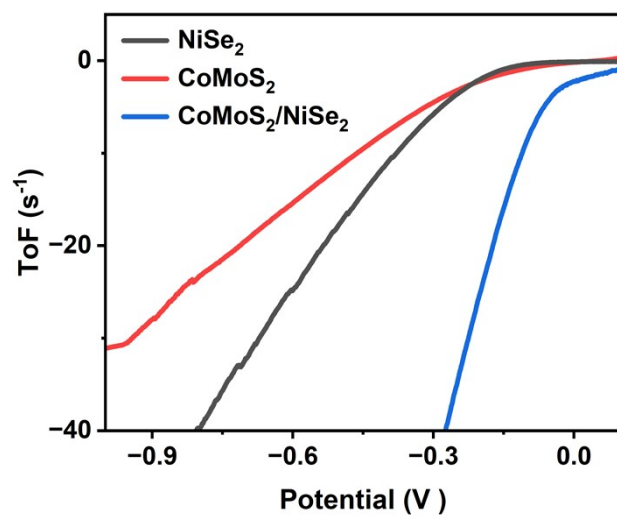

**Fig. S7** Calculated TOF of the catalysts for HER in 1.0 M KOH.

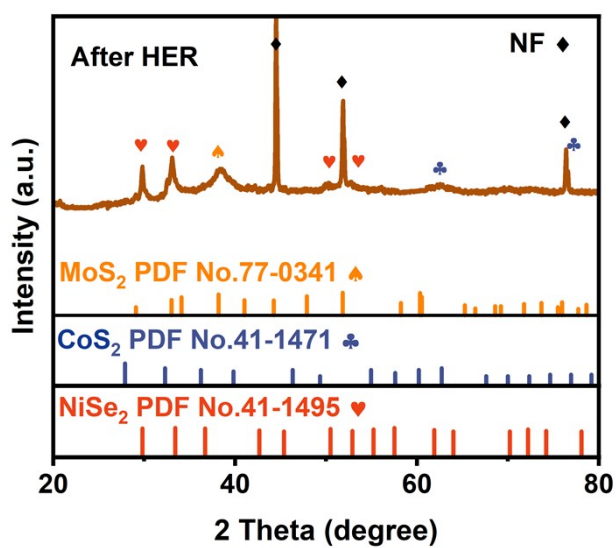

**Fig. S8** XRD patterns of  $\text{CoMoS}_2/\text{NiSe}_2$  before and after HER test.
